# Supplementary material for: The CIN4 Chromosomal Instability qPCR Classifier Defines Tumor Aneuploidy and Stratifies Outcome in Grade 2 Breast Cancer
Source: PLoS One. 2013 Feb 26;8(2):e56707. doi: 10.1371/journal.pone.0056707 (PMC3582639; doi:10.1371/journal.pone.0056707)
Supplement: Table S3 — Expression of control genes in the breast cancer tissue samples according to grade. (XLS) [file pone.0056707.s009.xls]

## Sheet: Table S3_Controls
Table S3. Expression of control genes in the breast cancer tissue samples according to grade.
Control genes	Groups (grade)	Mean	Std. Error Mean	p (t-test, 2-sided)	p (t-test, 2-sided)
PUM1_PCR	1	36.7022	0.18674	0.325452
	2	36.4337	0.196295		0.404629
	3	36.6931	0.244923
B4GALT3_PCR	1	37.0536	0.16605	0.197074
	2	36.7314	0.181012		0.297651
	3	37.0218	0.212423
SLC9A3R2_PCR	1	38.8103	0.256305	0.231666
	2	38.3762	0.248675		0.947208
	3	38.4006	0.269876
